# Supplementary material for: The characteristics of cognitive and daily living functions of neurocognitive disorders with delusions in elderly Alzheimer’s disease
Source: PeerJ. 2024 Sep 13;12:e18026. doi: 10.7717/peerj.18026 (PMC11404475; doi:10.7717/peerj.18026)
Supplement: Supplemental Information 1 [file peerj-12-18026-s001.xlsx]

## Sheet: raw data
No	age	sex_0=female, 1=male	education	baseline delusions_0=no, 1=yes	add delusions_0=no, 1=yes	CDR 1	CDR 2	1_Digit_span_Forward	2_Digit_span_Forward	1_Digit_span_Backward	2_Digit_span_Backward	1_Calculation_total_score	2_Calculation_total_score	1_Rey_CFT_copy_score	2_Rey_CFT_copy_score	1_SVLT_recall_total_score	2_SVLT_recall_total_score	1_SVLT_Delayed_recall	2_SVLT_Delayed_recall	1_RCFT_immediate_recall	2_RCFT_immediate_recall	1_RCFT_delayed_recall	2_RCFT_delayed_recall	1_Contrasting_program	2_Contrasting_program	1_Go_No_Go	2_Go_No_Go	1_COWAT_animal	2_COWAT_animal	1_COWAT_giut	2_COWAT_giut	1_Naming_S_K_BNT	2_Naming_S_K_BNT	1_KCWST_60	2_KCWST_60	1_DSC	2_DSC	1_K_TMT_E_A	2_K_TMT_E_A	1_K_TMT_E_B	2_K_TMT_E_B	1_K_IADL	2_K_IADL	1_B_ADL	2_B_ADL
1	68	0	12	0	1	1	2	3	3	2	0	2	1	21	1	9	8	0	0	1.5	0.5	0	0	20	0	10	0	16	7	5	5	10	9	19	9	25	0	58	120	111	300	1	1.33	20	14
2	80	0	6	0	0	0.5	1	6	6	2	4	9	2	31	8	7	31	0	10	2	0.5	2	2	20	20	20	20	14	10	5	5	8	10	4	36	35	31	33	46	63	91	0.11	1.1	20	20
3	70	0	6	0	0	0.5	0.5	4	4	3	3	8	7	33	30.5	22	15	8	5	13	10.5	9	11	20	20	20	20	13	18	3	4	11	12	32	41	45	41	20	19	38	43	0.1	0.27	20	20
4	77	0	0	0	0	0.5	0.5	3	4	2	2	3	6	1.5	2	10	15	0	0	1	1	0	0.5	11	20	20	10	14	12	2	#NULL!	10	9	0	#NULL!	8	13	45	#NULL!	300	#NULL!	0.1	0	20	20
5	79	0	6	0	0	0.5	0.5	3	4	3	3	4	8	20	25	17	11	4	1	4	0.5	0.5	3	20	20	20	20	8	6	1	4	2	3	25	21	19	15	67	54	300	300	0.3	0.22	20	20
6	83	0	0	0	0	1	1	4	3	0	2	0	1	1	3	5	6	3	2	1	1.5	0	0	19	0	11	0	5	10	1	#NULL!	8	7	0	#NULL!	0	0	147	#NULL!	0	#NULL!	0.75	0.5	20	20
7	69	0	3	0	0	1	1	5	4	2	3	6	7	13.5	9	5	8	0	0	3	3.5	3	3.5	14	0	20	0	8	9	0	1	12	11	16	13	20	20	40	40	174	227	0.33	0.45	20	20
8	77	1	5	0	0	0.5	0.5	7	7	4	4	8	8	16	16	10	10	0	2	5	4.5	4	5.5	18	20	9	10	14	16	6	10	12	13	22	31	25	25	31	25	80	103	0.2	0.4	20	20
9	81	0	0	0	1	0.5	1	4	3	3	0	2	1	4	4	15	5	2	0	2.5	3	0	0	19	18	19	17	12	7	#NULL!	#NULL!	7	11	0	0	0	0	0	73	0	0	0.33	1.4	19	19
10	77	1	2	0	0	0.5	0.5	4	3	2	2	2	4	3	14.5	5	13	0	0	1.5	1	1	0	0	18	0	10	4	12	3	4	7	9	0	7	0	15	169	60	300	300	0.6	0.22	20	20
11	75	0	6	0	0	0.5	0.5	4	5	4	3	10	10	31	32	15	13	1	0	3	1.5	2.5	0	6	19	0	9	10	12	11	6	12	13	41	42	45	51	41	25	51	49	0.1	0.09	20	20
12	72	0	6	0	0	0.5	0.5	5	4	3	3	4	6	28	28	16	13	3	3	10.5	12	8.5	8	20	20	12	20	14	14	2	5	11	11	15	12	27	27	44	37	154	300	0.1	0.1	20	20
13	80	1	6	0	0	0.5	1	4	4	3	2	6	6	18	10.5	7	7	0	0	0	0	0	0	20	20	18	20	8	6	0	0	6	5	23	10	24	22	56	44	300	300	0.56	1	20	20
14	84	0	4	0	0	0.5	1	4	4	3	3	6	4	11	13.5	13	4	0	0	10	0	6.5	0	18	0	14	0	11	9	2	0	11	11	12	11	15	14	43	90	300	300	1	2.55	18	16
15	82	0	0	0	0	0.5	0.5	3	3	0	0	0	2	2	0.5	9	4	0	0	0.5	0.5	0	0	0	0	0	0	10	4	#NULL!	#NULL!	6	4	0	0	8	0	0	0	0	0	0.4	0.5	20	20
16	77	1	10	0	1	1	2	0	3	0	2	2	1	2	6.5	6	6	0	0	1	3	0	1.5	0	0	0	0	6	7	1	4	1	4	0	0	12	0	300	300	0	300	1.22	2.44	20	15
17	86	0	0.5	0	0	1	1	4	6	2	3	4	4	11	5	12	11	2	1	1.5	5	0.5	3.5	20	18	17	8	9	10	0	0	5	5	6	4	8	5	50	51	300	300	1.25	0.7	18	18
18	78	0	4	0	1	1	1	4	4	3	2	6	5	6	10	18	18	3	0	1.5	2.5	1.5	0.5	19	0	11	0	13	12	3	3	5	3	4	4	21	0	59	45	261	300	0.6	1	20	18
19	80	0	0	0	0	1	0.5	4	4	0	2	0	4	1	1	8	13	0	0	0.5	0.5	0	0.5	0	0	0	0	6	12	#NULL!	#NULL!	3	6	0	0	0	0	0	60	0	300	0.75	0	15	20
20	75	1	2	0	1	2	2	3	3	0	0	2	1	0	0	6	5	0	0	0	0	0	0	0	0	0	0	5	3	0	0	4	4	0	0	0	0	300	300	300	300	2.44	2.91	16	11
21	75	1	6	0	0	1	1	4	3	3	2	5	4	10	11.5	8	7	0	0	1	5	3.5	0	20	5	10	6	10	8	1	0	10	7	0	0	12	18	50	85	300	300	0.38	0.67	20	20
22	71	0	9	0	0	1	1	5	7	2	3	10	11	19.5	5	7	8	1	1	2	0.5	1.5	0.5	13	0	12	0	5	7	4	2	8	8	4	9	7	14	50	51	300	155	1.22	1.5	19	19
23	70	0	0	0	0	0.5	0.5	4	4	2	2	6	6	4	3.5	20	18	0	7	1	1.5	0	0.5	20	20	9	20	8	13	#NULL!	#NULL!	11	8	0	#NULL!	13	11	72	#NULL!	148	#NULL!	0.2	0	20	20
24	82	0	0	0	1	0.5	1	4	4	0	0	4	2	0.5	2	7	5	0	0	0	2	0	0	0	0	0	0	3	6	#NULL!	#NULL!	4	4	0	0	0	0	87	96	300	300	0.33	1.22	20	20
25	80	0	0.5	0	0	0.5	1	4	4	2	2	1	0	15	16.5	22	6	5	1	7	4	2	2	19	20	17	15	15	4	6	#NULL!	9	5	32	#NULL!	24	18	37	#NULL!	90	#NULL!	0.2	1.4	20	20
26	81	0	0	0	0	0.5	0.5	5	5	0	0	4	5	1	2	14	8	0	0	0.5	1	0	0	0	0	0	0	7	9	#NULL!	#NULL!	7	9	0	0	19	12	58	43	300	300	0.4	0.6	20	20
27	78	0	6	0	0	0.5	0.5	5	5	4	4	10	11	23.5	33	13	8	0	0	0	4.5	0	6	19	20	19	16	9	6	7	4	5	6	27	16	26	18	36	36	111	300	0.22	0.56	20	20
28	73	0	0	0	0	0.5	0.5	4	4	3	2	4	5	0.5	3	9	10	0	0	0.5	1	0.5	0	1	0	2	0	9	7	#NULL!	#NULL!	5	6	0	0	15	2	48	42	300	300	0.2	0.6	20	20
29	74	0	1	0	1	1	0.5	4	4	2	2	5	5	2	5.5	7	7	0	0	0	0	0	0.5	0	0	14	0	9	1	0	0	8	7	21	29	0	9	55	97	300	300	0.67	0.78	20	20
30	77	0	4	0	0	0.5	0.5	4	3	0	2	3	2	2	2	12	12	0	1	0	1	0	1	0	0	0	0	5	3	0	0	13	12	0	0	3	13	110	83	300	300	0.22	0.56	20	20
31	75	0	0.5	0	0	0.5	0.5	3	4	2	2	6	6	10	8.5	16	19	0	3	1.5	0	0.5	0	17	20	19	20	16	14	4	2	10	13	17	17	14	9	38	31	156	95	0.44	0.3	20	18
32	80	0	0.5	0	1	0.5	1	3	3	0	2	4	5	4	3.5	7	5	0	0	0.5	0	0	0	20	0	9	0	2	4	0	0	2	2	14	0	1	0	59	150	300	300	0.25	0.56	20	19
33	78	0	1	0	0	0.5	1	4	3	2	2	4	2	0.5	0.5	6	7	0	1	0	0.5	0	0.5	10	0	20	0	12	11	0	0	5	6	12	6	2	18	82	58	300	300	0.73	1.3	20	20
34	85	0	0	0	0	1	1	3	3	0	0	0	0	1	1	7	4	0	0	0	0	0	0	0	0	0	0	3	3	#NULL!	#NULL!	5	3	0	#NULL!	0	#NULL!	0	#NULL!	0	#NULL!	1.82	2.4	20	20
35	83	0	0.5	0	0	1	1	3	3	3	2	4	3	9	16.5	2	3	0	0	0	0	0	0	17	0	6	0	5	4	#NULL!	#NULL!	8	7	0	0	0	0	74	111	300	300	1.1	1.6	18	19
36	80	0	6	0	0	0.5	1	4	4	3	2	3	3	4.5	4	10	4	2	0	0	0	0	0	0	0	0	0	10	3	4	0	6	3	4	0	0	0	87	122	300	300	0.82	1.27	20	20
37	75	0	2	0	0	0.5	1	4	4	2	2	4	3	3	18	8	11	0	0	1	0	0	0	0	0	1	0	8	10	0	3	7	8	8	10	14	20	44	35	300	300	0.64	1.91	20	15
38	79	0	6	0	0	0.5	1	4	5	3	3	6	6	11	21	11	10	0	0	0.5	0.5	0	0	10	20	4	11	9	12	3	4	10	10	8	9	23	33	33	27	128	62	0.56	1	20	20
39	87	0	4	0	0	0.5	1	4	3	2	2	7	10	16	16.5	7	8	0	0	0	0	0	0	20	20	20	10	5	4	1	3	11	11	6	21	14	15	74	69	300	300	0.91	2.14	20	17
40	73	0	0	0	1	1	1	3	3	0	2	0	3	9	20.5	11	9	0	0	0	2.5	0	0.5	19	20	10	10	14	11	#NULL!	#NULL!	10	9	18	#NULL!	0	4	71	#NULL!	300	#NULL!	0.82	0.55	20	20
41	66	1	6	0	0	0.5	0.5	5	6	3	2	11	10	28	16.5	10	9	0	0	2.5	2.5	0	0	18	20	11	8	6	7	5	3	15	13	27	12	25	24	25	31	85	300	0.18	0.8	20	20
42	78	1	12	0	0	0.5	0.5	6	4	3	3	11	11	19	21.5	12	12	0	0	0.5	1.5	0	0	20	20	10	10	20	12	9	5	12	13	27	28	43	32	26	63	140	120	0.55	1.2	20	20
43	79	0	7	0	0	1	2	6	5	3	2	7	6	2	3.5	8	11	0	0	0	0.5	0	0	#NULL!	0	#NULL!	0	3	5	#NULL!	5	4	4	0	0	0	0	109	96	0	300	1.6	2.55	16	15
44	75	0	6	0	0	0.5	5	4	5	3	3	5	5	12	7	18	17	6	0	0.5	2.5	1	3.5	20	20	15	20	21	15	5	7	12	9	27	27	22	20	28	38	106	124	0.3	0.2	20	20
45	73	1	9	0	0	0.5	5	6	5	3	4	12	12	32	28.5	11	15	1	3	11	12	9.5	6.5	20	20	18	19	23	14	11	7	13	14	31	31	39	30	31	37	68	83	0	0.09	20	20
46	72	1	6	0	0	1	1	3	3	3	2	6	5	29.5	26.5	10	10	1	0	9	10	7.5	6	20	20	19	18	9	8	5	3	11	11	11	16	24	18	54	53	102	111	0.73	0.5	20	20
47	82	0	0	0	0	0.5	0.5	4	6	3	3	6	6	28	30.5	11	8	0	0	4.5	0	0	0	20	20	20	20	9	6	4	3	12	10	26	24	23	20	30	54	300	300	0.18	0.27	20	20
48	78	1	6	0	1	0.5	1	5	5	3	2	10	9	2	0.5	5	6	1	0	0	0.5	0	0.5	20	0	9	0	5	6	0	0	8	8	0	5	0	0	110	106	300	300	0.33	2.3	20	15
49	73	0	0	0	0	1	1	6	6	0	0	3	0	0.5	2	6	12	0	0	0.5	1.5	0.5	1.5	0	0	0	0	6	11	#NULL!	#NULL!	6	9	0	#NULL!	0	0	300	#NULL!	0	#NULL!	1.56	1.9	20	20
50	77	1	1	0	1	0.5	1	4	4	2	2	5	6	2	3	5	12	0	0	0	0.5	0	0	0	20	0	12	12	14	0	1	14	13	10	6	0	1	76	36	300	300	0.6	0.9	20	20
51	90	0	0	0	1	0.5	1	0	3	0	0	1	1	0.5	1	6	7	0	0	0.5	0.5	0	0.5	0	0	0	0	6	5	#NULL!	#NULL!	4	4	0	#NULL!	0	0	300	#NULL!	0	#NULL!	0.91	1.6	19	18
52	82	0	3	0	0	1	2	5	4	3	3	6	3	3.5	1	6	5	0	0	0	0	0	0	0	0	0	0	6	7	6	0	5	3	19	10	11	0	25	32	300	300	20	2.09	20	19
53	83	0	0	0	0	1	1	3	3	2	2	2	1	0.5	0.5	10	7	0	0	0	0	0	0	18	0	17	0	8	10	#NULL!	#NULL!	2	2	0	#NULL!	0	0	#NULL!	#NULL!	#NULL!	#NULL!	1	1.6	18	17
54	76	0	0	0	0	0.5	0.5	5	4	3	3	3	1	8.5	12.5	12	14	4	0	0	0.5	0	2	20	1	12	10	7	8	#NULL!	#NULL!	6	4	#NULL!	#NULL!	16	16	#NULL!	#NULL!	#NULL!	#NULL!	0	0.3	20	20
55	78	1	9	0	1	0.5	1	4	4	2	2	6	6	22.5	15	15	6	0	1	6.5	5.5	6	0	20	20	8	10	7	4	1	1	10	8	11	0	23	18	40	58	300	300	0.2	0.73	20	20
56	79	1	14	0	0	0.5	0.5	6	5	3	3	12	12	29	28	14	15	2	0	11.5	12.5	8.5	14.5	20	19	20	20	11	14	9	8	13	13	34	28	47	44	14	17	28	35	0.18	0.3	20	20
57	82	1	15	0	1	1	1	5	5	3	3	9	10	34	29	5	6	0	0	2	0	0	0	20	20	11	20	7	4	8	3	8	5	21	9	33	27	19	52	126	300	1.55	2	20	20
58	70	0	6	0	0	0.5	0.5	4	4	2	2	5	6	14	5.5	9	11	0	2	0	0	0	0	20	20	11	9	9	12	3	7	8	8	22	23	20	24	22	20	57	300	0.7	1	20	19
59	83	0	6	0	0	0.5	1	5	5	3	2	5	7	14.5	9	14	10	0	0	0	0	0	0	0	0	0	0	11	12	7	8	11	8	12	18	17	15	41	65	300	300	0.55	1.73	20	20
60	76	0	0	0	1	0.5	1	3	3	0	0	1	0	0	0	6	0	0	0	0	0	0	0	0	0	0	0	4	0	#NULL!	#NULL!	2	3	0	#NULL!	0	0	300	300	300	300	0.3	1.13	20	18
61	67	0	9	1	#NULL!	2	2	5	5	2	3	10	9	25	19	13	10	0	0	0	4.5	2	0	15	20	4	0	10	7	5	2	12	11	18	2	31	34	31	36	300	300	1.43	2.27	20	16
62	78	0	0	1	#NULL!	0.5	0.5	3	5	3	3	3	3	7	9.5	6	5	0	0	1	0	0	0	19	0	9	0	7	9	#NULL!	#NULL!	8	7	0	0	0	15	88	64	300	300	0.4	0.11	20	20
63	82	1	12	1	1	1	2	5	5	3	3	4	5	8.5	28	4	2	0	0	3.5	7	2	13	0	8	0	4	13	13	4	5	11	11	20	17	17	15	44	52	111	135	1.78	2.45	15	16
64	83	0	6	1	#NULL!	1	1	4	5	3	4	11	11	22	32	9	14	0	0	2	5	0	0	20	20	8	4	4	7	6	6	7	10	34	44	39	31	29	35	167	105	1.56	1.9	19	19
65	74	1	6	1	#NULL!	2	2	4	4	2	3	4	8	9	17	9	11	2	5	2	0	2.5	4	12	16	7	18	8	10	3	6	11	13	0	5	17	30	77	49	75	74	0.89	1.56	16	16
66	76	0	0	1	1	1	1	3	3	0	0	3	3	1	1	8	8	0	0	0.5	0.5	0.5	0.5	0	0	0	0	10	6	#NULL!	#NULL!	8	7	0	#NULL!	30	0	22	#NULL!	300	#NULL!	0.45	2	19	17
67	80	0	12	1	#NULL!	1	1	5	6	3	4	9	11	5	1	12	11	3	0	0.5	0.5	0	0	4	19	5	13	5	8	3	4	8	9	2	0	9	16	66	54	300	227	1.11	0.89	20	20
68	84	0	0.5	1	1	1	2	4	3	0	0	1	0	10	0	5	4	0	0	0	0.5	0	0	0	0	0	0	5	0	#NULL!	0	4	2	0	0	9	0	132	300	300	300	1.56	2.73	18	7
69	77	0	6	1	1	0.5	0.5	4	6	2	3	5	5	16	30	16	15	0	0	0.5	0	0	0	19	20	11	10	18	15	3	7	11	13	36	29	34	28	34	21	66	125	0.9	1.2	20	20
70	74	0	6	1	#NULL!	0.5	0.5	4	5	3	3	9	9	8.5	20	13	12	0	0	0.5	0	0	0	18	20	14	18	13	14	5	8	8	9	0	0	15	0	81	47	300	110	0.38	0.89	20	20
71	79	1	0.5	1	#NULL!	0.5	1	4	4	2	2	6	4	22	1.5	15	5	3	0	11.5	0	7.8	0	0	2	6	4	16	6	4	3	13	12	16	5	14	12	48	67	192	300	0.3	1	20	20
72	68	1	4	1	1	0.5	2	4	4	4	0	6	5	5	0.5	15	8	1	0	1	0	0	0.5	20	4	10	9	9	8	0	1	13	8	8	0	1	0	46	53	300	300	0.5	2.55	19	11
73	78	0	2	1	1	1	1	5	4	2	2	2	3	2	3	10	8	0	0	0.5	0	0	0	19	20	13	10	5	4	0	0	9	7	19	13	0	0	54	69	300	300	1.09	2.27	20	19
74	75	0	6	1	#NULL!	0.5	1	4	4	2	3	5	4	14	9	9	5	3	0	0.5	0	0.5	0	0	0	0	0	8	6	0	0	5	6	4	3	22	0	41	41	300	300	1	1.7	20	19
75	84	0	0	1	1	1	1	4	5	2	0	5	4	1	1	8	5	0	0	0.5	0.5	0	0	0	0	0	0	5	2	#NULL!	#NULL!	2	2	0	#NULL!	0	0	0	#NULL!	0	#NULL!	1.6	1.9	19	18
76	74	1	9	1	#NULL!	1	1	3	3	3	2	10	7	20.5	13	10	9	1	2	6	2	8.5	3	20	20	8	7	11	3	0	1	11	10	9	2	27	25	39	40	111	163	1.18	1.4	17	18
77	81	0	7	1	#NULL!	0.5	0.5	5	4	2	2	11	9	22	15.5	6	5	0	0	2	0.5	0	0	4	0	10	0	6	6	2	3	8	8	15	13	14	12	43	53	300	300	0.27	0.7	20	20
78	83	1	6	1	#NULL!	1	1	4	4	3	3	5	6	1	2	4	5	0	0	0	0	0	0	0	0	0	0	6	6	0	0	3	3	0	0	0	7	108	71	300	300	1.55	1.7	20	20
79	85	0	0	1	1	1	1	3	3	2	2	3	3	2	3	7	4	0	0	0.5	0.5	0	0	0	0	0	0	4	4	#NULL!	#NULL!	7	6	0	#NULL!	11	0	64	#NULL!	0	#NULL!	0.7	1.82	20	20
80	79	1	6	1	1	0.5	1	5	5	3	2	5	4	5	2	10	8	0	0	0	1	0	1	0	0	0	0	8	7	3	3	10	9	3	0	13	0	79	180	300	300	0.4	2.1	20	17
81	69	0	6	1	1	1	3	5	3	2	0	3	0	5	0	6	0	0	0	1	0	0	0	0	0	0	0	5	0	2	0	10	5	0	0	10	0	70	300	300	300	1	2.91	20	13
